# Supplementary material for: Increased Afterload Following Myocardial Infarction Promotes Conduction-Dependent Arrhythmias That Are Unmasked by Hypokalemia
Source: PubMed Central journal article supplement — JACC Basic Transl Sci. 2017 Jun 26;2(3):258–69. doi: 10.1016/j.jacbts.2017.02.002 (PMC5547890; doi:10.1016/j.jacbts.2017.02.002), 2017-06-26

**Supplemental Table 1. VT/VF Characteristics**

|                                                | <b>Normal K<sup>+</sup> (NK)</b> | <b>Low K<sup>+</sup> (LK)</b>    | <b>P-Value<br/>NK vs. LK</b> |
|------------------------------------------------|----------------------------------|----------------------------------|------------------------------|
| <b><i>Rate<br/>(cycle length)</i></b>          | 321.5±22.8/min<br>(189.3±13.2ms) | 492.8±55.6/min<br>(127.8±17.7ms) | 0.029<br>(0.032)             |
| <b><i>Incidence VT/VF<br/>MI group</i></b>     | 3/8                              | 0/5                              |                              |
| <b><i>Incidence VT/VF<br/>MI/iAL group</i></b> | 1/8                              | 4/7                              |                              |
| <b>P-Value<br/>MI vs. MI/iAL</b>               | 0.248                            | 0.038                            |                              |

NK= Normal K<sup>+</sup>, LK= Low K<sup>+</sup>; comparisons between groups were performed with Chi-squared test for nominal, and Student's t-test for rational variables.

**Supplemental Figure 1. A.** Steady-state APD restitution curves calculated for the average APD<sub>80</sub> values measured from the subendocardial, mid-myocardial, and subepicardial layers during normokalemia (Ctrl: n=11, MI: n=7 and MI/iAL: n=9) and hypokalemia (Ctrl: n=10, MI: n=4 and MI/iAL: n=7). **B.** Transmural APD heterogeneity indexed by SD and range of APD<sub>80</sub> values across the transmural wall during normo- and hypokalemia at PCL 1000 ms and 250 ms. Endo: subendocardial region within 2 mm of the endocardial surface, Epi: subepicardial region within 2 mm of the epicardial surface, Mid: mid-myocardial region defined as a 2 mm wide layer in the mid-wall region.

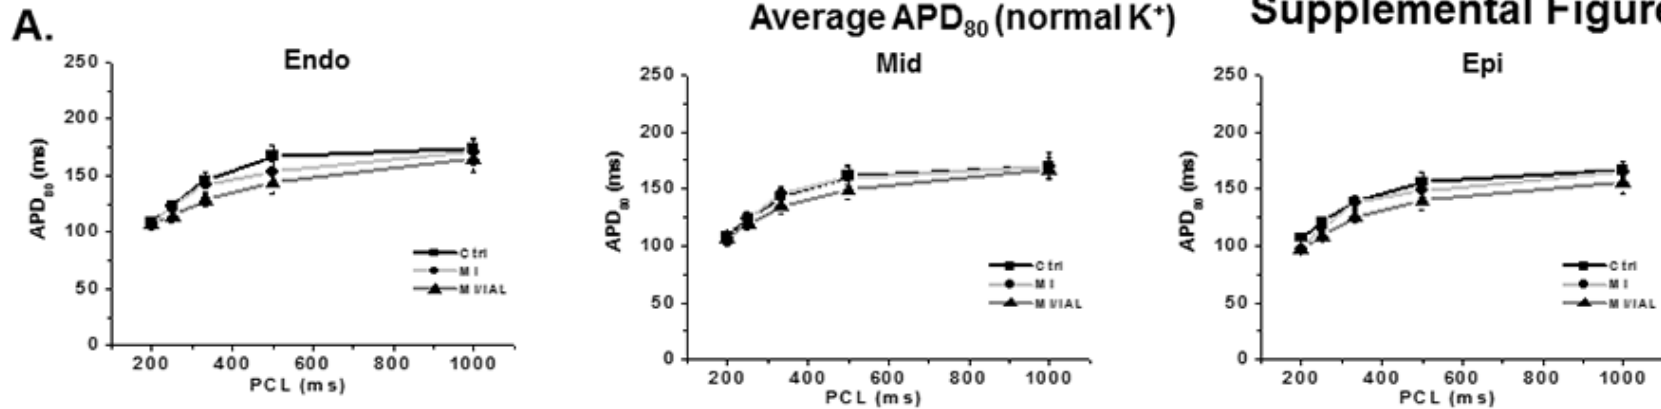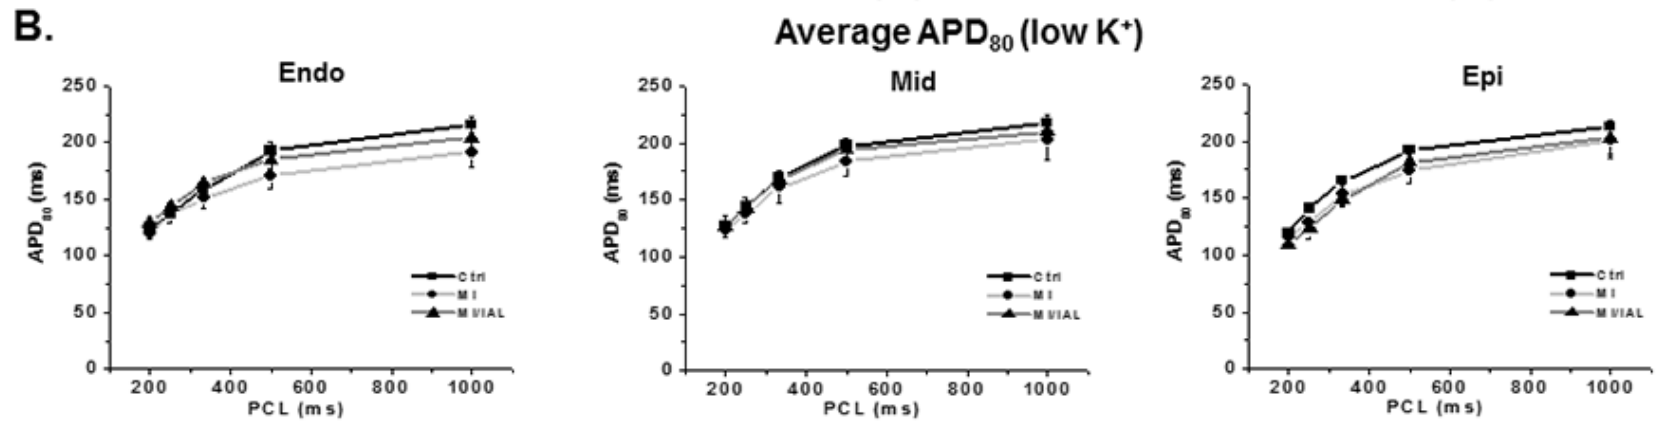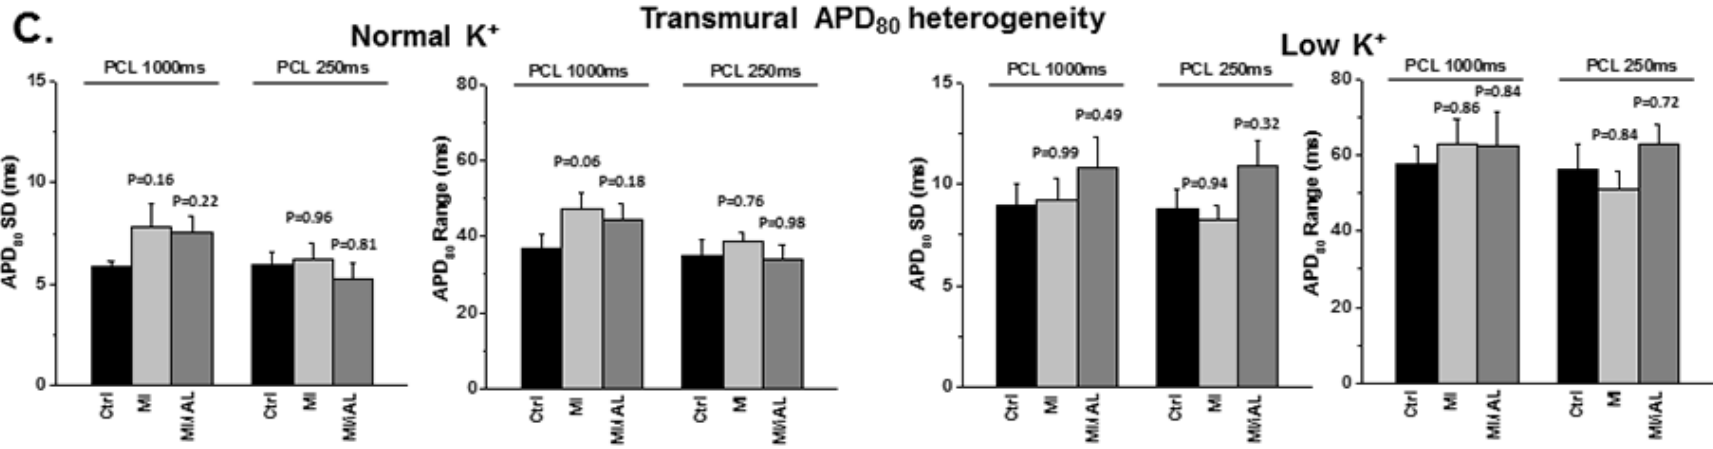

Supplement: NIHMS881712-supplement.pdf [file NIHMS881712-supplement.pdf]
